# Supplementary material
Source: PubMed Central journal article supplement (PMC7529680)
Supplement: NIHMS1581430-supplement-1.pdf [file NIHMS1581430-supplement-1.pdf]

# The Longitudinal Assessment of Neuropsychiatric Symptoms in Mild Cognitive Impairment and Alzheimer's Disease and Their Association With White Matter Hyperintensities in the National Alzheimer's Coordinating Center's Uniform Data Set

## *SUPPLEMENTAL INFORMATION*

**Supplementary Table S1. MMSE sub-domain sub-scores and total scores at baseline.**

|                                        | MCI-AD           | AD               |
|----------------------------------------|------------------|------------------|
| MMSE Orientation-Time (mean $\pm$ SD)  | 4.22 $\pm$ 1.07  | 3.07 $\pm$ 1.65  |
| MMSE Orientation-Place (mean $\pm$ SD) | 4.44 $\pm$ 0.86  | 3.43 $\pm$ 1.40  |
| MMSE Pentagon (mean $\pm$ SD)          | 0.85 $\pm$ 0.36  | 0.62 $\pm$ 0.49  |
| Total MMSE Score (mean $\pm$ SD)       | 26.34 $\pm$ 7.39 | 21.66 $\pm$ 4.76 |

**Supplementary Table S2. The time frame (in years) between the baseline MRI and clinic visits, as well as the time frame (in years) between consecutive clinic visits (years).**

|                                                            | Visit 1<br>(N=252) | Visit 2<br>(N=247) | Visit 3<br>(N=184) | Visit 4<br>(N=117) | Visit 5<br>(N=55) | Visit 6<br>(N=30) |
|------------------------------------------------------------|--------------------|--------------------|--------------------|--------------------|-------------------|-------------------|
| Average time between clinic visit and baseline MRI (years) | 0.06 $\pm$ 0.1     | 1.06 $\pm$ 0.3     | 2.23 $\pm$ 0.5     | 3.26 $\pm$ 0.5     | 4.37 $\pm$ 0.8    | 5.61 $\pm$ 1.0    |
| Average time between consecutive clinic visits (years)     |                    | 1.11 $\pm$ 0.0     | 1.19 $\pm$ 0.4     | 1.14 $\pm$ 0.3     | 1.15 $\pm$ 0.6    | 1.08 $\pm$ 0.3    |

**Supplementary Table S3. Baseline mixed-effect model**

| <b>Delusions Severity Score</b>      |          |       |        |         |
|--------------------------------------|----------|-------|--------|---------|
|                                      | Estimate | SE    | tStat  | pValue  |
| Age                                  | 0.029    | 0.056 | 0.524  | 0.601   |
| Sex                                  | 0.113    | 0.105 | 1.074  | 0.284   |
| Education                            | -0.084   | 0.051 | -1.642 | 0.102   |
| WMH                                  | 0.022    | 0.055 | 0.393  | 0.694   |
| <b>Hallucinations Severity Score</b> |          |       |        |         |
|                                      | Estimate | SE    | tStat  | pValue  |
| Age                                  | -0.045   | 0.032 | -1.382 | 0.168   |
| Sex                                  | 0.055    | 0.061 | 0.900  | 0.369   |
| Education                            | 0.170    | 0.030 | 5.714  | 0.000** |
| WMH                                  | 0.009    | 0.032 | 0.289  | 0.773   |

| <b>Agitation Severity Score</b>     |          |       |        |        |
|-------------------------------------|----------|-------|--------|--------|
|                                     | Estimate | SE    | tStat  | pValue |
| Age                                 | -0.001   | 0.068 | -0.009 | 0.993  |
| Sex                                 | 0.107    | 0.128 | 0.835  | 0.405  |
| Education                           | -0.102   | 0.063 | -1.638 | 0.103  |
| WMH                                 | -0.051   | 0.067 | -0.756 | 0.450  |
| <b>Depression Severity Score</b>    |          |       |        |        |
|                                     | Estimate | SE    | tStat  | pValue |
| Age                                 | -0.141   | 0.063 | -2.222 | 0.027  |
| Sex                                 | 0.199    | 0.119 | 1.665  | 0.097  |
| Education                           | -0.082   | 0.058 | -1.401 | 0.163  |
| WMH                                 | 0.087    | 0.062 | 1.385  | 0.167  |
| <b>Anxiety Severity Score</b>       |          |       |        |        |
|                                     | Estimate | SE    | tStat  | pValue |
| Age                                 | -0.112   | 0.068 | -1.649 | 0.101  |
| Sex                                 | 0.140    | 0.127 | 1.099  | 0.273  |
| Education                           | -0.034   | 0.062 | -0.546 | 0.586  |
| WMH                                 | -0.020   | 0.067 | -0.295 | 0.769  |
| <b>Elation Severity Score</b>       |          |       |        |        |
|                                     | Estimate | SE    | tStat  | pValue |
| Age                                 | -0.035   | 0.053 | -0.656 | 0.513  |
| Sex                                 | -0.049   | 0.100 | -0.484 | 0.629  |
| Education                           | -0.030   | 0.049 | -0.619 | 0.537  |
| WMH                                 | -0.059   | 0.053 | -1.133 | 0.259  |
| <b>Apathy Severity Score</b>        |          |       |        |        |
|                                     | Estimate | SE    | tStat  | pValue |
| Age                                 | -0.029   | 0.063 | -0.454 | 0.650  |
| Sex                                 | -0.097   | 0.119 | -0.816 | 0.415  |
| Education                           | -0.024   | 0.058 | -0.415 | 0.679  |
| WMH                                 | -0.035   | 0.062 | -0.563 | 0.574  |
| <b>Disinhibition Severity Score</b> |          |       |        |        |
|                                     | Estimate | SE    | tStat  | pValue |
| Age                                 | -0.026   | 0.064 | -0.411 | 0.681  |
| Sex                                 | -0.046   | 0.120 | -0.385 | 0.701  |
| Education                           | -0.060   | 0.059 | -1.021 | 0.308  |
| WMH                                 | 0.064    | 0.063 | 1.020  | 0.309  |
| <b>Irritability Severity Score</b>  |          |       |        |        |
|                                     | Estimate | SE    | tStat  | pValue |
| Age                                 | -0.057   | 0.066 | -0.860 | 0.391  |

|                                                |          |       |        |        |
|------------------------------------------------|----------|-------|--------|--------|
| Sex                                            | -0.180   | 0.125 | -1.443 | 0.150  |
| Education                                      | -0.109   | 0.061 | -1.782 | 0.076  |
| WMH                                            | -0.024   | 0.065 | -0.360 | 0.719  |
| <b>Aberrant Motor Behaviour Severity Score</b> |          |       |        |        |
|                                                | Estimate | SE    | tStat  | pValue |
| Age                                            | 0.005    | 0.062 | 0.076  | 0.939  |
| Sex                                            | 0.138    | 0.116 | 1.186  | 0.237  |
| Education                                      | -0.021   | 0.057 | -0.376 | 0.707  |
| WMH                                            | 0.034    | 0.061 | 0.550  | 0.583  |
| <b>Night-time Behaviour Severity Score</b>     |          |       |        |        |
|                                                | Estimate | SE    | tStat  | pValue |
| Age                                            | 0.068    | 0.072 | 0.951  | 0.342  |
| Sex                                            | 0.116    | 0.135 | 0.863  | 0.389  |
| Education                                      | -0.088   | 0.066 | -1.338 | 0.182  |
| WMH                                            | 0.055    | 0.071 | 0.777  | 0.438  |
| <b>Appetite Severity Score</b>                 |          |       |        |        |
|                                                | Estimate | SE    | tStat  | pValue |
| Age                                            | -0.057   | 0.061 | -0.936 | 0.350  |
| Sex                                            | -0.056   | 0.115 | -0.486 | 0.628  |
| Education                                      | -0.006   | 0.056 | -0.111 | 0.912  |
| WMH                                            | -0.001   | 0.060 | -0.020 | 0.984  |

**Supplementary Table S4. Longitudinal Mixed-Effect Models of Annualized Change in NPI sub-scores explained by age, time (between baseline and clinical exam date), sex, education, whole brain WMH load and NPS severity scores, and interaction between time and WMH.**

| <b>Change in Delusions Severity Score</b>      |          |       |        |                |
|------------------------------------------------|----------|-------|--------|----------------|
|                                                | Estimate | SE    | tStat  | pValue         |
| Age                                            | 0.029    | 0.040 | 0.729  | 0.466          |
| Time (between baseline and clinical exam date) | 0.091    | 0.024 | 3.710  | 0.000**        |
| Sex                                            | 0.202    | 0.074 | 2.742  | 0.006**        |
| Education                                      | 0.065    | 0.034 | 1.915  | 0.056**        |
| WMH                                            | -0.003   | 0.050 | -0.061 | 0.952          |
| Delusions baseline severity score              | 0.458    | 0.037 | 12.512 | 0.000**        |
| Interaction between Time and WMH               | 0.056    | 0.024 | 2.282  | <b>0.023**</b> |

| <b>Change in Hallucinations Severity Score</b> |          |       |        |                |
|------------------------------------------------|----------|-------|--------|----------------|
|                                                | Estimate | SE    | tStat  | pValue         |
| Age                                            | 0.016    | 0.044 | 0.366  | 0.715          |
| Time (between baseline and clinical exam date) | 0.112    | 0.026 | 4.252  | 0.000**        |
| Sex                                            | 0.023    | 0.081 | 0.281  | 0.779          |
| Education                                      | -0.048   | 0.041 | -1.175 | 0.240          |
| WMH                                            | -0.035   | 0.055 | -0.633 | 0.527          |
| Hallucinations baseline severity score         | 0.299    | 0.045 | 6.722  | 0.000**        |
| Interaction between Time and WMH               | 0.054    | 0.026 | 2.060  | <b>0.040**</b> |
| <b>Change in Agitation Severity Score</b>      |          |       |        |                |
|                                                | Estimate | SE    | tStat  | pValue         |
| Age                                            | 0.004    | 0.034 | 0.108  | 0.914          |
| Time (between baseline and clinical exam date) | 0.045    | 0.023 | 2.007  | 0.045**        |
| Sex                                            | 0.094    | 0.063 | 1.483  | 0.139          |
| Education                                      | 0.036    | 0.029 | 1.246  | 0.213          |
| WMH                                            | 0.017    | 0.045 | 0.387  | 0.699          |
| Agitation baseline severity score              | 0.635    | 0.032 | 19.990 | 0.000**        |
| Interaction between Time and WMH               | 0.038    | 0.023 | 1.681  | <b>0.093**</b> |
| <b>Change in Depression Severity Score</b>     |          |       |        |                |
|                                                | Estimate | SE    | tStat  | pValue         |
| Age                                            | -0.085   | 0.037 | -2.318 | 0.021**        |
| Time (between baseline and clinical exam date) | 0.022    | 0.024 | 0.917  | 0.359          |
| Sex                                            | 0.159    | 0.067 | 2.388  | 0.017**        |
| Education                                      | -0.007   | 0.030 | -0.239 | 0.811          |
| WMH                                            | -0.027   | 0.048 | -0.573 | 0.567          |
| Depression baseline severity score             | 0.505    | 0.033 | 15.308 | 0.000**        |
| Interaction between Time and WMH               | 0.058    | 0.024 | 2.382  | <b>0.017**</b> |
| <b>Change in Anxiety Severity Score</b>        |          |       |        |                |
|                                                | Estimate | SE    | tStat  | pValue         |
| Age                                            | -0.077   | 0.037 | -2.095 | 0.036**        |
| Time (between baseline and clinical exam date) | 0.034    | 0.026 | 1.318  | 0.188          |
| Sex                                            | 0.029    | 0.067 | 0.435  | 0.664          |
| Education                                      | -0.016   | 0.030 | -0.525 | 0.600          |

|                                                |          |       |        |            |
|------------------------------------------------|----------|-------|--------|------------|
| WMH                                            | -0.012   | 0.049 | -0.253 | 0.801      |
| Anxiety baseline severity score                | 0.455    | 0.033 | 13.868 | 0.000**    |
| Interaction between Time and WMH               | 0.028    | 0.026 | 1.085  | 0.278      |
| <b>Change in Elation Severity Score</b>        |          |       |        |            |
|                                                | Estimate | SE    | tStat  | pValue     |
| Age                                            | -0.056   | 0.034 | -1.665 | 0.096**    |
| Time (between baseline and clinical exam date) | 0.026    | 0.024 | 1.106  | 0.269      |
| Sex                                            | -0.013   | 0.062 | -0.211 | 0.833      |
| Education                                      | -0.004   | 0.028 | -0.159 | 0.874      |
| WMH                                            | 0.053    | 0.045 | 1.162  | 0.246      |
| Elation baseline severity score                | 0.648    | 0.034 | 19.311 | 0.000**    |
| Interaction between Time and WMH               | 0.008    | 0.024 | 0.357  | 0.721      |
| <b>Change in Apathy Severity Score</b>         |          |       |        |            |
|                                                | Estimate | SE    | tStat  | pValue     |
| Age                                            | -0.038   | 0.038 | -1.003 | 0.316      |
| Time (between baseline and clinical exam date) | 0.098    | 0.023 | 4.320  | 1.76E-05** |
| Sex                                            | -0.114   | 0.069 | -1.649 | 0.100      |
| Education                                      | 0.039    | 0.032 | 1.207  | 0.228      |
| WMH                                            | -0.010   | 0.047 | -0.218 | 0.828      |
| Apathy baseline severity score                 | 0.565    | 0.034 | 16.830 | 1.57E-54** |
| Interaction between Time and WMH               | 0.027    | 0.023 | 1.1784 | 0.239      |
| <b>Change in Disinhibition Severity Score</b>  |          |       |        |            |
|                                                | Estimate | SE    | tStat  | pValue     |
| Age                                            | 0.017    | 0.039 | 0.430  | 0.667      |
| Time (between baseline and clinical exam date) | 0.039    | 0.024 | 1.652  | 0.099**    |
| Sex                                            | 0.069    | 0.072 | 0.959  | 0.338      |
| Education                                      | 0.034    | 0.033 | 1.008  | 0.313      |
| WMH                                            | 0.030    | 0.049 | 0.604  | 0.546      |
| Disinhibition baseline severity score          | 0.543    | 0.036 | 14.889 | 2.35E-44** |
| Interaction between Time and WMH               | 0.024    | 0.024 | 1.028  | 0.304      |
| <b>Change in Irritability Severity Score</b>   |          |       |        |            |
|                                                | Estimate | SE    | tStat  | pValue     |
| Age                                            | -0.010   | 0.038 | -0.256 | 0.798      |

|                                                          |          |       |        |                |
|----------------------------------------------------------|----------|-------|--------|----------------|
| Time (between baseline and clinical exam date)           | 0.020    | 0.022 | 0.893  | 0.372          |
| Sex                                                      | 0.018    | 0.070 | 0.261  | 0.794          |
| Education                                                | 0.034    | 0.032 | 1.056  | 0.291          |
| WMH                                                      | 0.008    | 0.046 | 0.169  | 0.866          |
| Irritability baseline severity score                     | 0.611    | 0.034 | 17.777 | 0.000**        |
| Interaction between Time and WMH                         | 0.069    | 0.022 | 3.151  | <b>0.002**</b> |
| <b>Change in Aberrant Motor Behaviour Severity Score</b> |          |       |        |                |
|                                                          | Estimate | SE    | tStat  | pValue         |
| Age                                                      | -0.001   | 0.038 | -0.034 | 0.970          |
| Time (between baseline and clinical exam date)           | 0.075    | 0.025 | 3.005  | 0.000**        |
| Sex                                                      | 0.079    | 0.070 | 1.121  | 0.260          |
| Education                                                | -0.026   | 0.032 | -0.825 | 0.410          |
| WMH                                                      | 0.019    | 0.050 | 0.379  | 0.700          |
| Aberrant motor behaviour baseline severity score         | 0.463    | 0.034 | 13.719 | 0.000**        |
| Interaction between Time and WMH                         | -0.021   | 0.025 | -0.850 | 0.400          |
| <b>Change in Night-Time Behaviour Severity Score</b>     |          |       |        |                |
|                                                          | Estimate | SE    | tStat  | pValue         |
| Age                                                      | -0.031   | 0.038 | -0.830 | 0.407          |
| Time (between baseline and clinical exam date)           | 0.004    | 0.025 | 0.144  | 0.886          |
| Sex                                                      | -0.105   | 0.069 | -1.532 | 0.126          |
| Education                                                | 0.020    | 0.032 | 0.629  | 0.529          |
| WMH                                                      | 0.044    | 0.049 | 0.910  | 0.363          |
| Night-time behaviour baseline severity score             | 0.503    | 0.034 | 15.008 | 0.000**        |
| Interaction between Time and WMH                         | 0.004    | 0.025 | 0.147  | 0.883          |
| <b>Change in Appetite Severity Score</b>                 |          |       |        |                |
|                                                          | Estimate | SE    | tStat  | pValue         |
| Age                                                      | -0.056   | 0.039 | -1.411 | 0.159          |
| Time (between baseline and clinical exam date)           | 0.053    | 0.027 | 2.005  | 0.045**        |
| Sex                                                      | 0.003    | 0.072 | 0.040  | 0.968          |
| Education                                                | 0.002    | 0.033 | 0.073  | 0.942          |
| WMH                                                      | 0.034    | 0.052 | 0.658  | 0.511          |
| Appetite baseline severity score                         | 0.377    | 0.035 | 10.910 | 0.000**        |
| Interaction between Time and WMH                         | 0.022    | 0.027 | 0.814  | 0.416          |

\*\* denotes statistical significance, ◇Denotes a trend; one-tailed test  $p < 0.1$
